# Supplementary material for: Local and global perspectives on the virtual water trade
Source: Copernicus journal article supplement (doi:10.5194/hess-17-1205-2013), 2013-03-19
Supplement: Supplementary file 1 [file hess-17-1205-2013-supplement.pdf]

## SUPPLEMENTARY MATERIAL (A): TABLE OF ITEMS

**Table A.** List of the 309 items considered in the analysis, with corresponding FAOSTAT identification number, description, category to which it belongs, and presence/absence in the sub-list of items considered for the internal production (only primary crop products and derived animal products are included -if present in the complete list-).

| id  | crop                    | Category    | Production | id  | crop                          | Category    | Production |
|-----|-------------------------|-------------|------------|-----|-------------------------------|-------------|------------|
| 15  | Wheat                   | plant-based | yes        | 128 | Cassava Dried                 | plant-based | no         |
| 16  | Flour of Wheat          | plant-based | no         | 129 | Cassava Starch                | plant-based | no         |
| 18  | Macaroni                | plant-based | no         | 135 | Yautia (cocoyam)              | plant-based | yes        |
| 20  | Bread                   | plant-based | no         | 136 | Taro (cocoyam)                | plant-based | yes        |
| 27  | Rice, paddy             | plant-based | yes        | 137 | Yams                          | plant-based | yes        |
| 28  | Rice Husked             | plant-based | no         | 149 | Roots and Tubers, nes         | plant-based | yes        |
| 31  | Rice Milled             | plant-based | no         | 150 | Flour of Roots and Tubers     | plant-based | no         |
| 32  | Rice Broken             | plant-based | no         | 156 | Sugar cane                    | luxury      | yes        |
| 38  | Rice Flour              | plant-based | no         | 157 | Sugar beet                    | luxury      | yes        |
| 44  | Barley                  | plant-based | yes        | 160 | Maple Sugar and Syrups        | luxury      | yes        |
| 46  | Barley Pearled          | plant-based | no         | 161 | Sugar crops, nes              | luxury      | yes        |
| 48  | Barley Flour and Grits  | plant-based | no         | 162 | Sugar Raw Centrifugal         | luxury      | no         |
| 49  | Malt                    | plant-based | no         | 164 | Sugar Refined                 | luxury      | no         |
| 51  | Beer of Barley          | luxury      | no         | 165 | Molasses                      | luxury      | no         |
| 56  | Maize                   | plant-based | yes        | 166 | Other Fructose and Syrup      | luxury      | yes        |
| 58  | Flour of Maize          | plant-based | no         | 167 | Sugar, nes                    | luxury      | no         |
| 60  | Maize oil               | plant-based | no         | 171 | Sugar flavoured               | luxury      | no         |
| 71  | Rye                     | plant-based | yes        | 172 | Glucose and Dextrose          | luxury      | yes        |
| 72  | Flour of Rye            | plant-based | no         | 176 | Beans, dry                    | plant-based | no         |
| 75  | Oats                    | plant-based | yes        | 181 | Broad beans, horse beans, dry | plant-based | yes        |
| 76  | Oats Rolled             | plant-based | no         | 187 | Peas, dry                     | plant-based | no         |
| 79  | Millet                  | plant-based | yes        | 191 | Chick peas                    | plant-based | yes        |
| 83  | Sorghum                 | plant-based | yes        | 195 | Cow peas, dry                 | plant-based | yes        |
| 89  | Buckwheat               | plant-based | yes        | 197 | Pigeon peas                   | plant-based | yes        |
| 92  | Quinoa                  | plant-based | yes        | 201 | Lentils                       | plant-based | yes        |
| 94  | Fonio                   | plant-based | yes        | 203 | Bambara beans                 | plant-based | yes        |
| 97  | Triticale               | plant-based | yes        | 205 | Vetches                       | plant-based | yes        |
| 101 | Canary seed             | plant-based | yes        | 210 | Lupins                        | plant-based | yes        |
| 103 | Mixed grain             | plant-based | yes        | 211 | Pulses, nes                   | plant-based | yes        |
| 108 | Cereals, nes            | plant-based | yes        | 212 | Flour of Pulses               | plant-based | no         |
| 116 | Potatoes                | plant-based | yes        | 216 | Brazil nuts, with shell       | plant-based | yes        |
| 117 | Potatoes Flour          | plant-based | no         | 217 | Cashew nuts, with shell       | plant-based | yes        |
| 118 | Frozen Potatoes         | plant-based | no         | 220 | Chestnuts                     | plant-based | yes        |
| 120 | Potato Offals           | plant-based | no         | 221 | Almonds, with shell           | plant-based | yes        |
| 212 | Flour of Pulses         | plant-based | no         | 289 | Sesame seed                   | plant-based | yes        |
| 216 | Brazil nuts, with shell | plant-based | yes        | 290 | Sesame oil                    | plant-based | no         |
| 217 | Cashew nuts, with shell | plant-based | yes        | 292 | Mustard seed                  | plant-based | yes        |
| 220 | Chestnuts               | plant-based | yes        | 296 | Poppy seed                    | plant-based | yes        |
| 221 | Almonds, with shell     | plant-based | yes        | 299 | Melonseed                     | plant-based | yes        |
| 222 | Walnuts, with shell     | plant-based | yes        | 329 | Cottonseed                    | non edible  | yes        |
| 223 | Pistachios              | plant-based | yes        | 331 | Cottonseed oil                | plant-based | no         |
| 224 | Kolanuts                | plant-based | yes        | 332 | Cake of Cottonseed            | non edible  | no         |

**Table A.** (continue...)

| id  | crop                           | Category    | Production | id  | crop                          | Category    | Production |
|-----|--------------------------------|-------------|------------|-----|-------------------------------|-------------|------------|
| 225 | Hazelnuts, with shell          | plant-based | yes        | 333 | Linseed                       | non edible  | yes        |
| 226 | Arecanuts                      | luxury      | yes        | 334 | Linseed oil                   | non edible  | no         |
| 231 | Almonds Shelled                | plant-based | no         | 335 | Cake of Linseed               | non edible  | no         |
| 232 | Walnuts Shelled                | plant-based | no         | 336 | Hempseed                      | plant-based | yes        |
| 233 | Hazelnuts Shelled              | plant-based | no         | 339 | Oilseeds, Nes                 | plant-based | yes        |
| 234 | Nuts, nes                      | plant-based | yes        | 340 | Oil of vegetable origin, nes  | plant-based | no         |
| 235 | Prepared Nuts (Exc.Groundnuts) | plant-based | no         | 358 | Cabbages and other brassicas  | plant-based | yes        |
| 236 | Soybeans                       | plant-based | yes        | 366 | Artichokes                    | plant-based | yes        |
| 237 | Soybean oil                    | plant-based | no         | 367 | Asparagus                     | plant-based | yes        |
| 238 | Cake of Soybeans               | plant-based | no         | 372 | Lettuce and chicory           | plant-based | yes        |
| 239 | Soya Sauce                     | plant-based | no         | 373 | Spinach                       | plant-based | yes        |
| 240 | Soya Paste                     | plant-based | no         | 388 | Tomatoes                      | plant-based | yes        |
| 241 | Soya curd                      | plant-based | no         | 389 | Tomatojuice Concentrated      | plant-based | no         |
| 242 | Groundnuts, with shell         | plant-based | yes        | 390 | Juice of Tomatoes             | plant-based | no         |
| 243 | Groundnuts Shelled             | plant-based | no         | 391 | Paste of Tomatoes             | plant-based | no         |
| 244 | Groundnut oil                  | plant-based | no         | 392 | Tomato Peeled                 | plant-based | no         |
| 249 | Coconuts                       | plant-based | yes        | 393 | Cauliflowers and broccoli     | plant-based | yes        |
| 251 | Copra                          | plant-based | no         | 394 | Pumpkins, squash and gourds   | plant-based | yes        |
| 252 | Coconut (copra) oil            | plant-based | no         | 397 | Cucumbers and gherkins        | plant-based | yes        |
| 256 | Palm kernels                   | plant-based | yes        | 399 | Eggplant-baseds (aubergines)  | plant-based | yes        |
| 257 | Palm oil                       | plant-based | no         | 401 | Chillies and peppers, green   | plant-based | yes        |
| 258 | Palm kernel oil                | plant-based | no         | 402 | Onions (inc. shallots), green | plant-based | yes        |
| 259 | Cake of Palm Kernel            | plant-based | no         | 403 | Onions, dry                   | plant-based | no         |
| 260 | Olives                         | plant-based | yes        | 406 | Garlic                        | plant-based | yes        |
| 261 | Olive oil, virgin              | plant-based | no         | 414 | Beans, green                  | plant-based | yes        |
| 262 | Olives Preserved               | plant-based | no         | 417 | Peas, green                   | plant-based | yes        |
| 263 | Karite Nuts (Sheanuts)         | plant-based | yes        | 423 | String beans                  | plant-based | yes        |
| 264 | Butter of Karite Nuts          | plant-based | no         | 426 | Carrots and turnips           | plant-based | yes        |
| 265 | Castor oil seed                | non edible  | yes        | 430 | Okra                          | plant-based | yes        |
| 266 | Oil of Castor Beans            | non edible  | no         | 446 | Maize, green                  | plant-based | yes        |
| 267 | Sunflower seed                 | plant-based | yes        | 447 | Sweet Corn Frozen             | plant-based | yes        |
| 268 | Sunflower oil                  | plant-based | no         | 460 | Veg.Prod.Fresh Or Dried       | plant-based | no         |
| 269 | Sunflower Cake                 | non edible  | no         | 461 | Carobs                        | plant-based | yes        |
| 270 | Rapeseed                       | plant-based | yes        | 463 | Vegetables fresh nes          | plant-based | yes        |
| 271 | Rapeseed oil                   | plant-based | no         | 466 | Juice of Vegetables Nes       | plant-based | no         |
| 272 | Cake of Rapeseed               | non edible  | no         | 469 | Vegetables Dehydrated         | plant-based | no         |
| 273 | Olive Residues                 | non edible  | no         | 471 | Vegetables in Vinegar         | plant-based | no         |
| 278 | Oil of Jojoba                  | luxury      | yes        | 472 | Vegetables Preserved Nes      | plant-based | no         |
| 280 | Safflower seed                 | plant-based | yes        | 473 | Vegetable Frozen              | plant-based | no         |
| 486 | Bananas                        | plant-based | yes        | 603 | Fruit, tropical fresh nes     | plant-based | yes        |
| 489 | Plantains                      | plant-based | yes        | 604 | Fruit Tropical Dried Nes      | plant-based | no         |
| 490 | Oranges                        | plant-based | yes        | 619 | Fruit Fresh Nes               | plant-based | yes        |
| 491 | Orange juice, single strength  | plant-based | no         | 622 | Fruit Juice Nes               | plant-based | no         |
| 495 | Tangerines, mandarins, clem.   | plant-based | yes        | 656 | Coffee, green                 | luxury      | yes        |
| 497 | Lemons and limes               | plant-based | yes        | 657 | Coffee Roasted                | luxury      | no         |
| 507 | Grapefruit (inc. pomelos)      | plant-based | yes        | 661 | Cocoa beans                   | luxury      | yes        |
| 509 | Juice of Grapefruit            | plant-based | no         | 662 | Cocoa Paste                   | luxury      | no         |

**Table A.** (continue...)

| id  | crop                           | Category     | Production | id   | crop                           | Category     | Production |
|-----|--------------------------------|--------------|------------|------|--------------------------------|--------------|------------|
| 512 | Citrus fruit, nes              | plant-based  | yes        | 663  | Cocoahusks;Shell               | non edible   | no         |
| 513 | Citrus juice, single strength  | plant-based  | no         | 664  | Cocoa Butter                   | luxury       | no         |
| 515 | Apples                         | plant-based  | yes        | 665  | Cocoapowder and Cake           | luxury       | no         |
| 517 | Cider Etc                      | plant-based  | no         | 666  | Chocolate Prsnes               | luxury       | no         |
| 518 | Apple juice, single strength   | plant-based  | no         | 667  | Tea                            | luxury       | yes        |
| 521 | Pears                          | plant-based  | yes        | 677  | Hops                           | luxury       | yes        |
| 526 | Apricots                       | plant-based  | yes        | 687  | Pepper (Piper spp.)            | luxury       | yes        |
| 527 | Dry Apricots                   | plant-based  | no         | 689  | Chillies and peppers, dry      | luxury       | no         |
| 530 | Sour cherries                  | plant-based  | yes        | 692  | Vanilla                        | luxury       | yes        |
| 531 | Cherries                       | plant-based  | yes        | 693  | Cinnamon (canella)             | luxury       | yes        |
| 534 | Peaches and nectarines         | plant-based  | yes        | 698  | Cloves                         | luxury       | yes        |
| 536 | Plums and sloes                | plant-based  | yes        | 702  | Nutmeg, mace and cardamoms     | luxury       | yes        |
| 537 | Plums Dried (Prunes)           | plant-based  | no         | 711  | Anise, badian, fennel, corian. | luxury       | yes        |
| 541 | Stone fruit, nes               | non edible   | yes        | 720  | Ginger                         | luxury       | yes        |
| 544 | Strawberries                   | plant-based  | yes        | 723  | Spices, nes                    | luxury       | yes        |
| 547 | Raspberries                    | plant-based  | yes        | 748  | Peppermint                     | plant-based  | yes        |
| 549 | Gooseberries                   | plant-based  | yes        | 767  | Cotton lint                    | non edible   | yes        |
| 550 | Currants                       | plant-based  | yes        | 768  | Cotton Carded,Combed           | non edible   | no         |
| 552 | Blueberries                    | plant-based  | yes        | 769  | Cotton Waste                   | non edible   | no         |
| 554 | Cranberries                    | plant-based  | yes        | 770  | Cotton Linter                  | non edible   | yes        |
| 558 | Berries Nes                    | plant-based  | yes        | 773  | Flax fibre and tow             | non edible   | yes        |
| 560 | Grapes                         | plant-based  | yes        | 774  | Flax Tow Waste                 | non edible   | no         |
| 561 | Raisins                        | plant-based  | no         | 777  | Hemp Tow Waste                 | non edible   | yes        |
| 562 | Grape Juice                    | plant-based  | no         | 780  | Jute                           | non edible   | yes        |
| 563 | Must of Grapes                 | luxury       | no         | 782  | Other Bastfibres               | non edible   | yes        |
| 564 | Wine                           | luxury       | no         | 788  | Ramie                          | non edible   | yes        |
| 565 | Vermouths and Similar          | luxury       | no         | 789  | Sisal                          | non edible   | yes        |
| 566 | Marc of Grapes                 | luxury       | no         | 800  | Agave Fibres Nes               | non edible   | yes        |
| 567 | Watermelons                    | plant-based  | yes        | 809  | Manila Fibre (Abaca)           | non edible   | yes        |
| 568 | Other melons (inc.cantaloupes) | plant-based  | yes        | 821  | Fibre Crops Nes                | non edible   | yes        |
| 569 | Figs                           | plant-based  | yes        | 826  | Tobacco, unmanufactured        | luxury       | yes        |
| 571 | Mangoes, mangosteens, guavas   | plant-based  | yes        | 836  | Natural rubber                 | non edible   | yes        |
| 572 | Avocados                       | plant-based  | yes        | 866  | Cattle                         | animal-based | no         |
| 574 | Pineapples                     | plant-based  | yes        | 867  | Cattle meat                    | animal-based | yes        |
| 576 | Juice of Pineapples            | plant-based  | no         | 868  | Offals of cattle, edible       | animal-based | yes        |
| 577 | Dates                          | plant-based  | yes        | 870  | Meat-Cattle, boneless          | animal-based | yes        |
| 591 | Cashew apple                   | plant-based  | yes        | 872  | Meat of Beef,Drd, SltD,Smkd    | animal-based | yes        |
| 592 | Kiwi fruit                     | plant-based  | yes        | 874  | Sausage Beef and Veal          | animal-based | yes        |
| 600 | Papayas                        | plant-based  | yes        | 882  | Cow milk, whole, fresh         | animal-based | yes        |
| 886 | Butter Cow Milk                | animal-based | no         | 1035 | Pig meat                       | animal-based | yes        |
| 888 | Milk Skm of Cows               | animal-based | no         | 1036 | Offals of Pigs, Edible         | animal-based | yes        |
| 889 | Milk Whole Cond                | animal-based | no         | 1037 | Fat of Pigs                    | animal-based | yes        |
| 890 | Whey Condensed                 | animal-based | no         | 1039 | Bacon and Ham                  | animal-based | no         |
| 891 | Yoghurt                        | animal-based | no         | 1041 | Sausages of Pig Meat           | animal-based | no         |
| 893 | Butterm.,CurdL,Acid.Milk       | animal-based | no         | 1042 | Prep of Pig Meat               | animal-based | no         |
| 897 | Milk Whole Dried               | animal-based | no         | 1057 | Chickens                       | animal-based | yes        |
| 898 | Milk Skimmed Dry               | animal-based | no         | 1062 | Hen eggs, in shell             | animal-based | yes        |

**Table A.** (continue...)

| id   | crop                     | Category     | Production | id   | crop                       | Category     | Production |
|------|--------------------------|--------------|------------|------|----------------------------|--------------|------------|
| 901  | Cheese of Whole Cow Milk | animal-based | no         | 1063 | Eggs Liquid                | animal-based | no         |
| 905  | Whey Cheese              | animal-based | no         | 1064 | Eggs Dried                 | animal-based | no         |
| 907  | Processed Cheese         | animal-based | no         | 1069 | Duck meat                  | animal-based | yes        |
| 909  | Prod.of Nat.Milk Constit | animal-based | no         | 1073 | Goose and guinea fowl meat | animal-based | yes        |
| 919  | Cattle hides             | non edible   | yes        | 1080 | Turkey meat                | animal-based | yes        |
| 920  | Hides Wet Salted Cattle  | non edible   | no         | 1091 | Other bird eggs,in shell   | animal-based | yes        |
| 921  | Hidesdry S.Cattle        | non edible   | no         | 1096 | Horses                     | animal-based | no         |
| 976  | Sheep                    | animal-based | no         | 1097 | Horse meat                 | animal-based | yes        |
| 977  | Sheep meat               | animal-based | yes        | 1100 | Hair of Horses             | non edible   | yes        |
| 978  | Offals of Sheep,Edible   | animal-based | yes        | 1103 | Hides Wet Salted Horses    | non edible   | no         |
| 984  | Cheese of Sheep Milk     | animal-based | yes        | 1104 | Hides Dry Slt Horses       | non edible   | no         |
| 998  | Skins Nes Sheep          | non edible   | yes        | 1105 | Hides Unsp Horse           | non edible   | yes        |
| 999  | Skins With Wool Sheep    | non edible   | yes        | 1107 | Asses                      | animal-based | yes        |
| 1016 | Goats                    | animal-based | no         | 1110 | Mules                      | animal-based | yes        |
| 1017 | Goat meat                | animal-based | yes        | 1159 | Offals other camelids      | animal-based | yes        |
| 1018 | Offals of Goats, Edible  | animal-based | yes        | 1187 | Cocoon Unr. and Waste      | non edible   | yes        |
| 1021 | Cheese of Goat Mlk       | animal-based | yes        | 1219 | Hair Coarse Nes            | non edible   | yes        |
| 1025 | Goatskins                | non edible   | yes        | 1232 | Food Prep Nes              | plant-based  | no         |
| 1034 | Pigs                     | animal-based | no         |      |                            |              |            |

SUPPLEMENTARY MATERIAL (B): OTHER COUNTRIES

AUSTRALIA

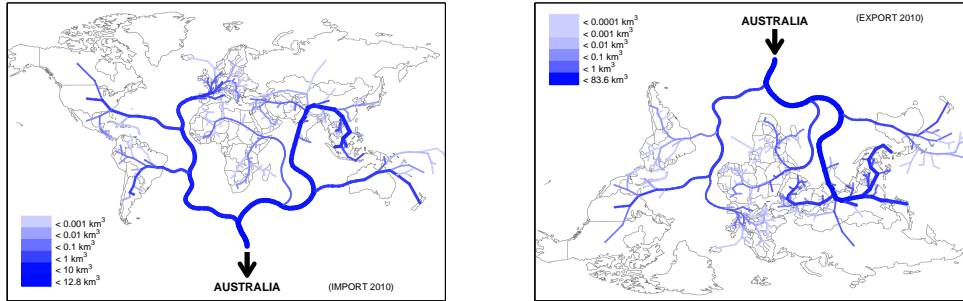

Fig. I.a. The virtual water river/delta flowing to/from the country in 2010.

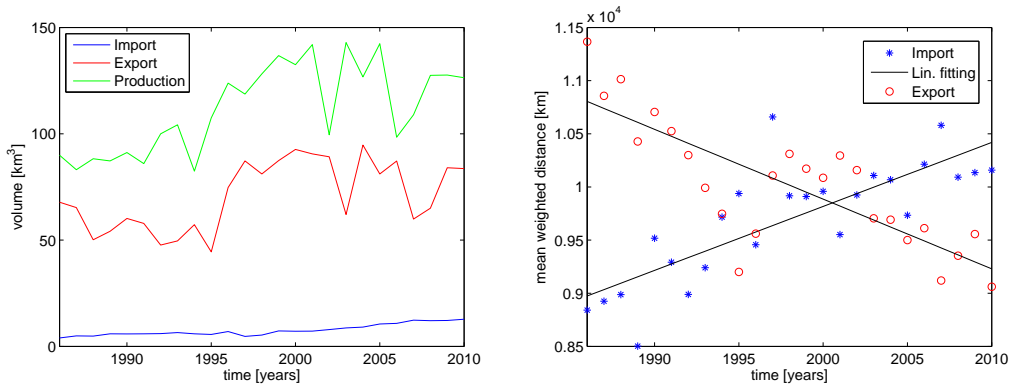

Fig. I.b. Virtual water balance of the country (left) and mean distance travelled by virtual water flowing to/from the country (right), in the period 1986-2010.

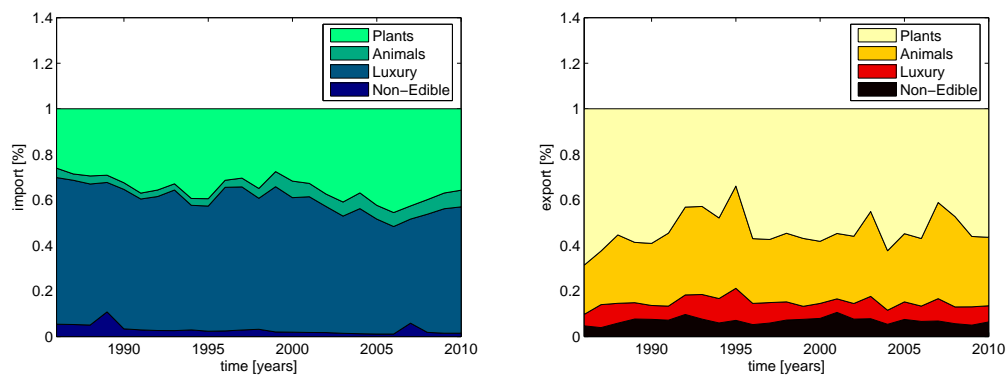

Fig. I.c. Contributions of each category to the total import (left) and export (right) of the country in the period 1986-2010.

# BRAZIL

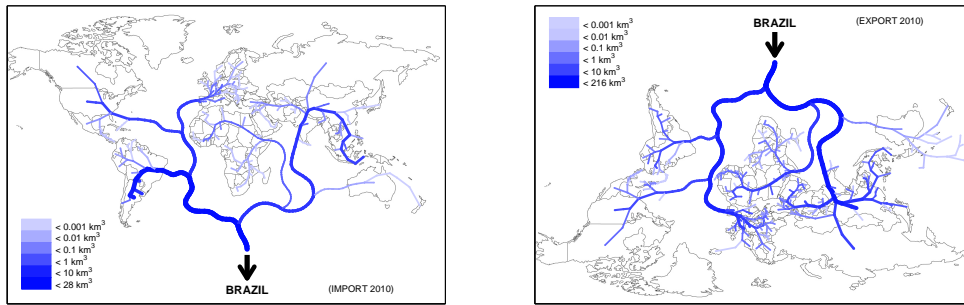

**Fig. II.a.** The virtual water river/delta flowing to/from the country in 2010.

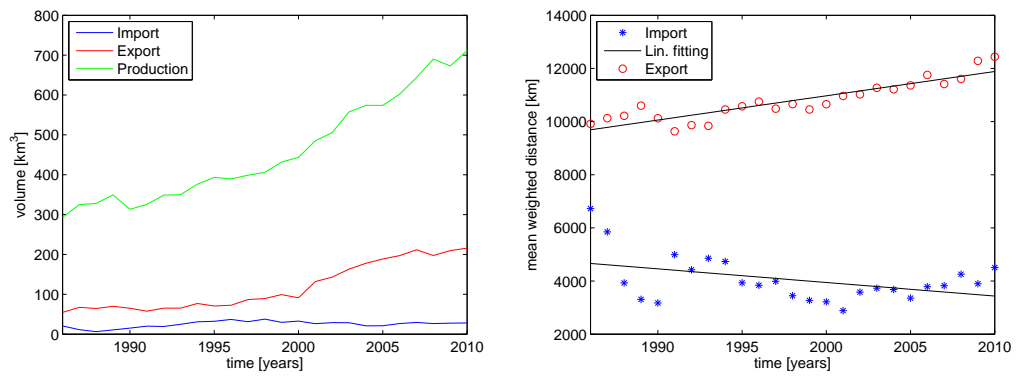

**Fig. II.b.** Virtual water balance of the country (left) and mean distance travelled by virtual water flowing to/from the country (right), in the period 1986-2010.

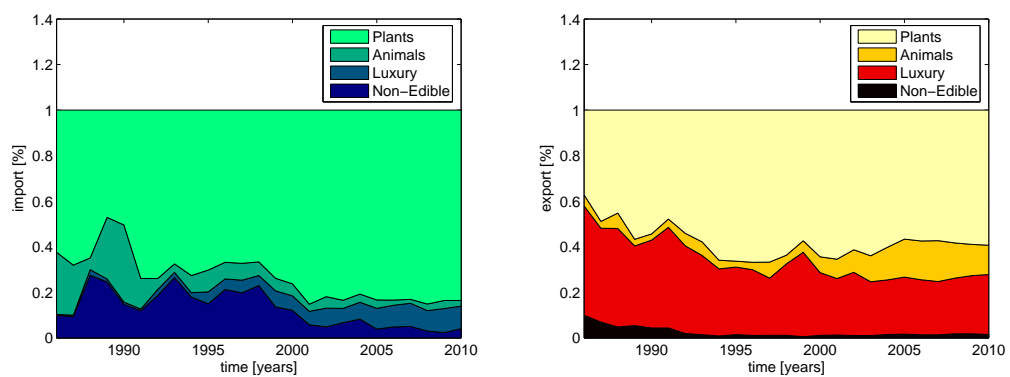

**Fig. II.c.** Contributions of each category to the total import (left) and export (right) of the country in the period 1986-2010.

# CHINA

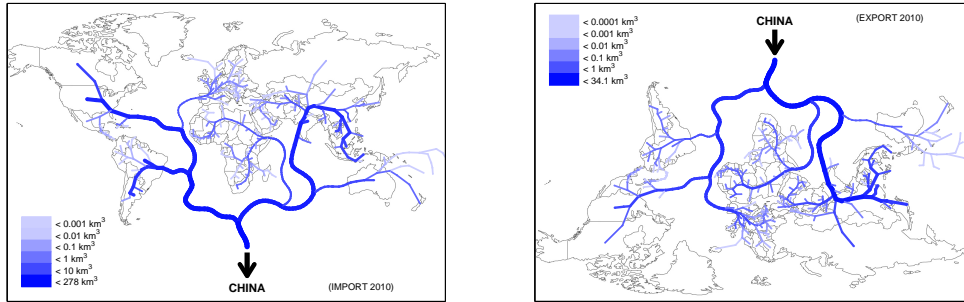

Fig. III.a. The virtual water river/delta flowing to/from the country in 2010.

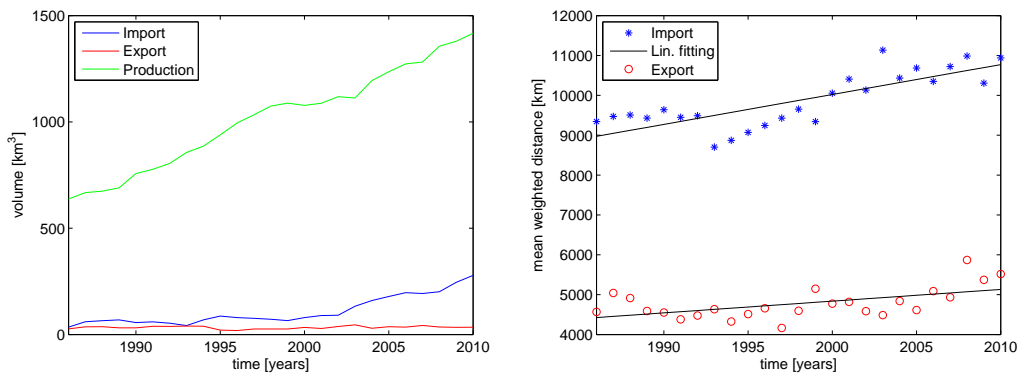

Fig. III.b. Virtual water balance of the country (left) and mean distance travelled by virtual water flowing to/from the country (right), in the period 1986-2010.

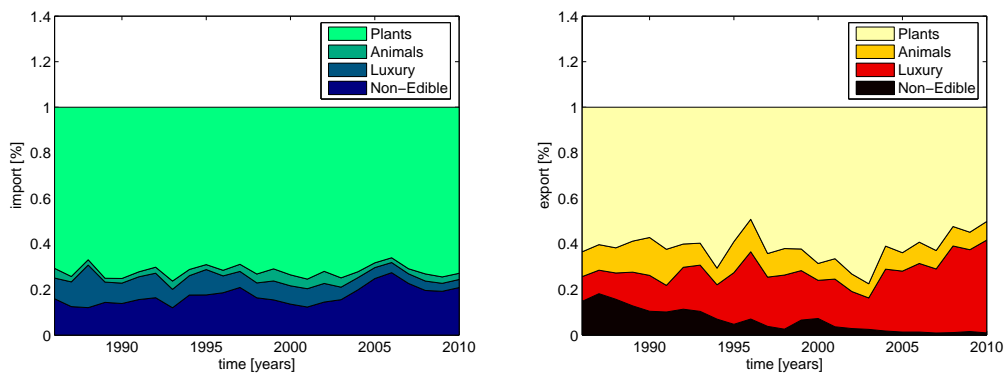

Fig. III.c. Contributions of each category to the total import (left) and export (right) of the country in the period 1986-2010.

# EGYPT

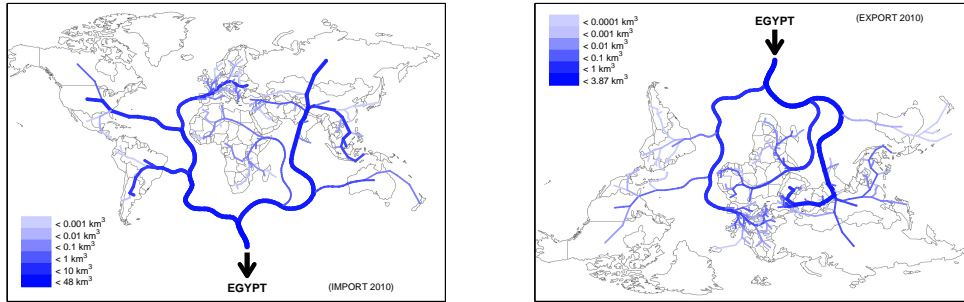

Fig. IV.a. The virtual water river/delta flowing to/from the country in 2010.

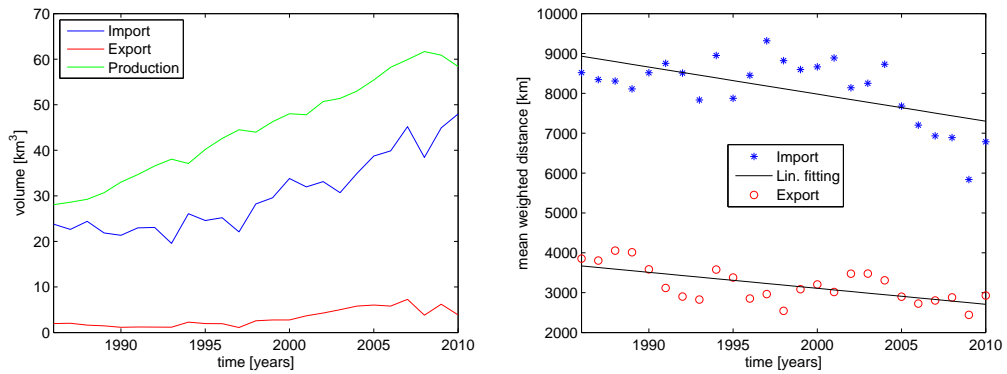

Fig. IV.b. Virtual water balance of the country (left) and mean distance travelled by virtual water flowing to/from the country (right), in the period 1986-2010.

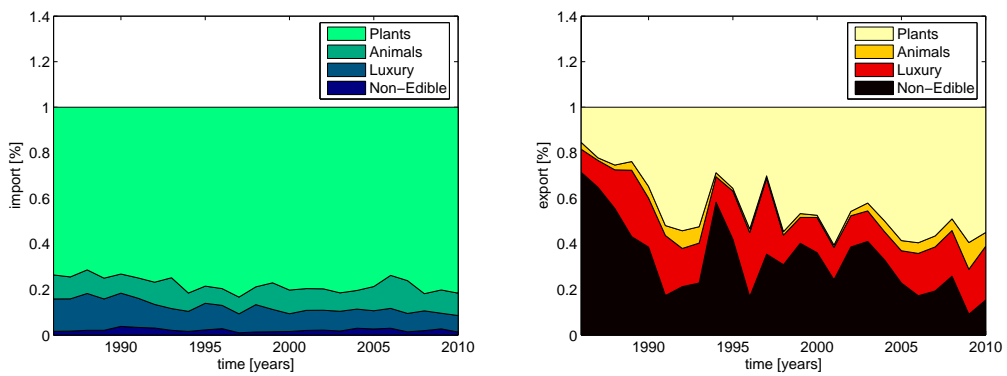

Fig. IV.c. Contributions of each category to the total import (left) and export (right) of the country in the period 1986-2010.



# FRANCE

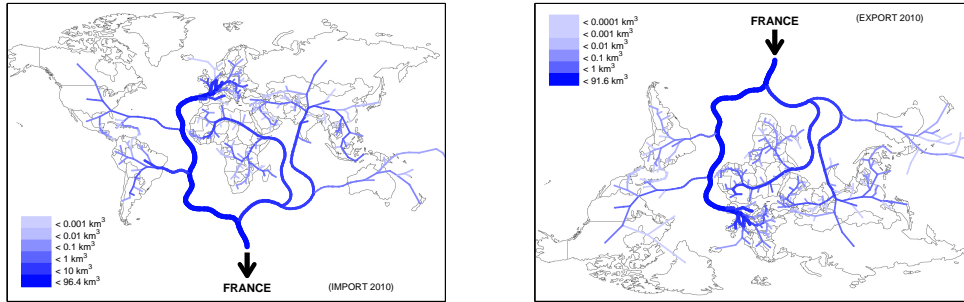

**Fig. V.a.** The virtual water river/delta flowing to/from the country in 2010.

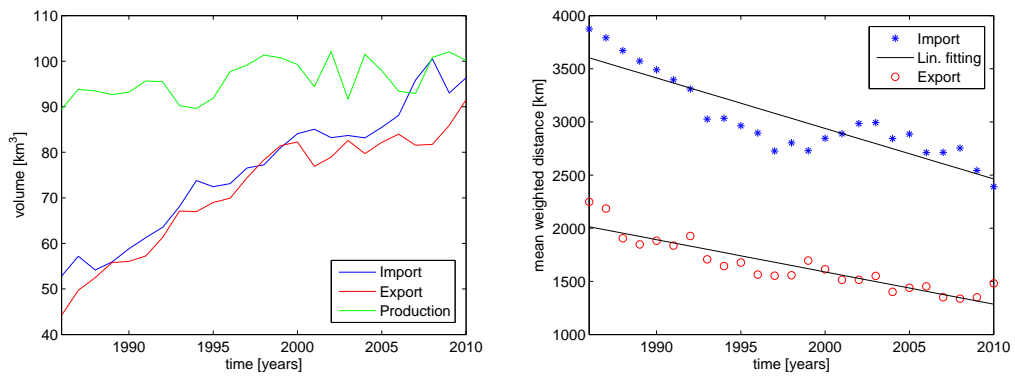

**Fig. V.b.** Virtual water balance of the country (left) and mean distance travelled by virtual water flowing to/from the country (right), in the period 1986-2010.

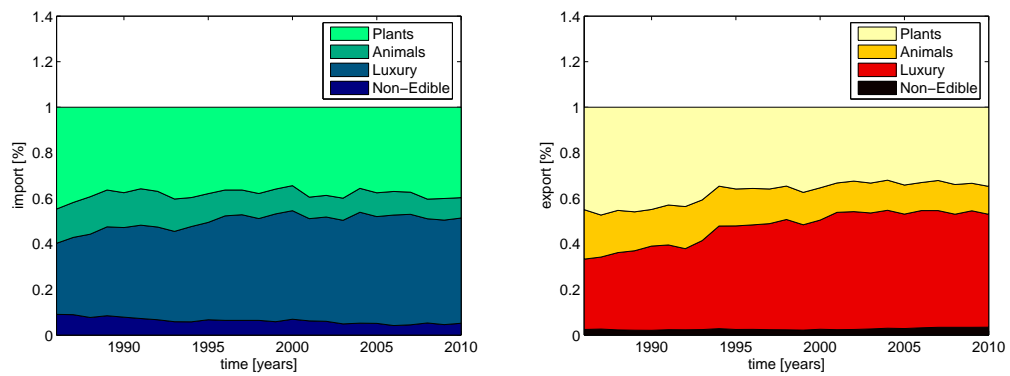

**Fig. V.c.** Contributions of each category to the total import (left) and export (right) of the country in the period 1986-2010.

# GERMANY

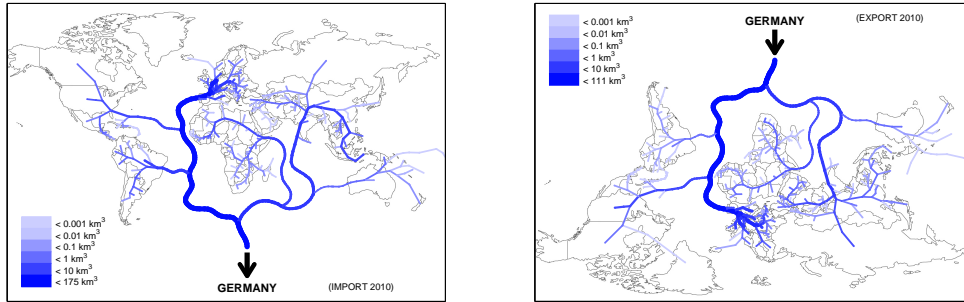

**Fig. VI.a.** The virtual water river/delta flowing to/from the country in 2010.

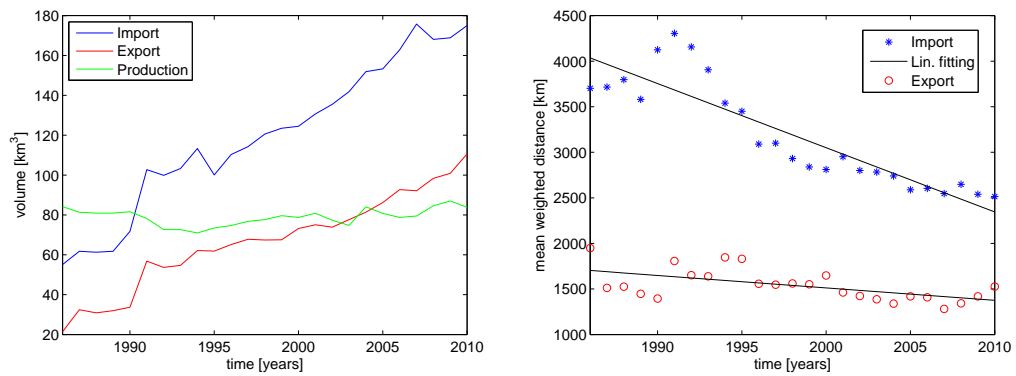

**Fig. VI.b.** Virtual water balance of the country (left) and mean distance travelled by virtual water flowing to/from the country (right), in the period 1986-2010.

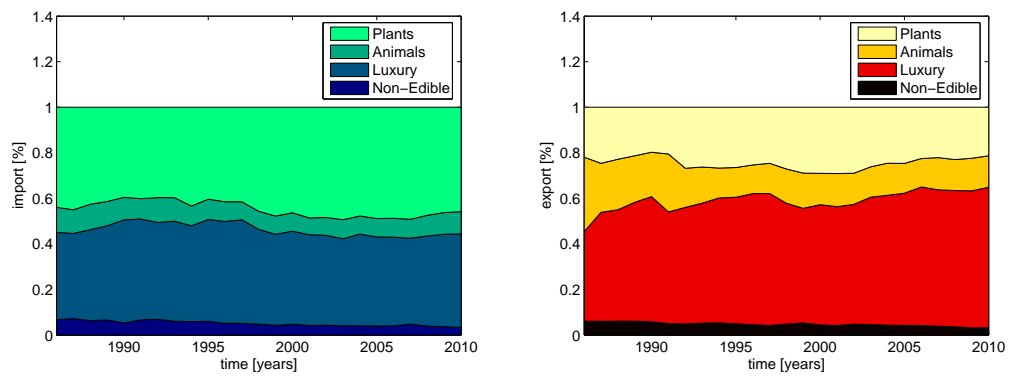

**Fig. VI.c.** Contributions of each category to the total import (left) and export (right) of the country in the period 1986-2010.

# INDIA

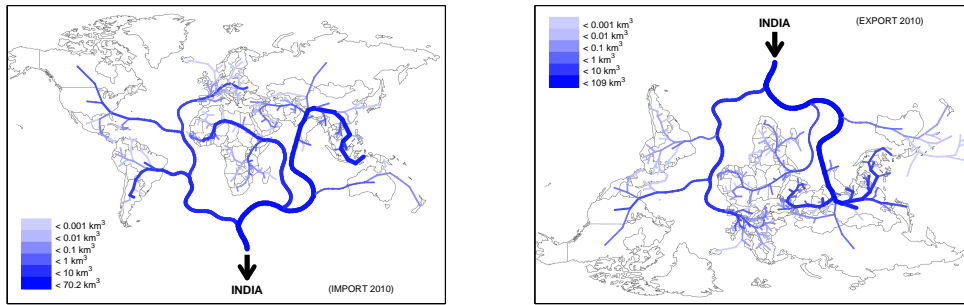

**Fig. VII.a.** The virtual water river/delta flowing to/from the country in 2010.

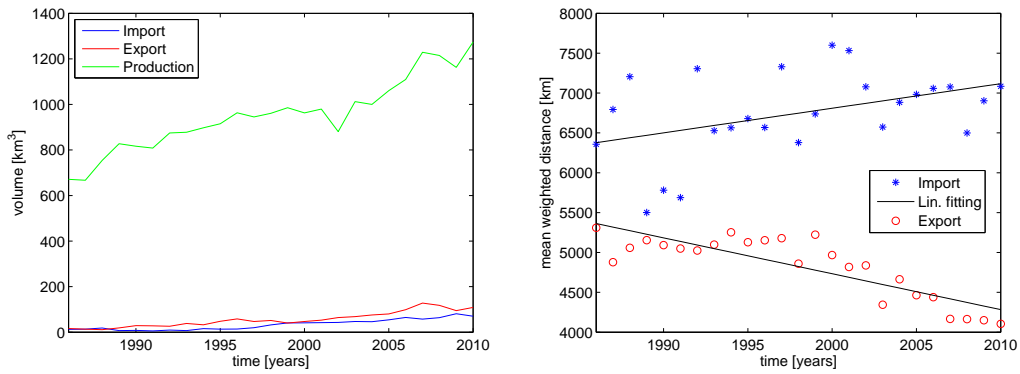

**Fig. VII.b.** Virtual water balance of the country (left) and mean distance travelled by virtual water flowing to/from the country (right), in the period 1986-2010.

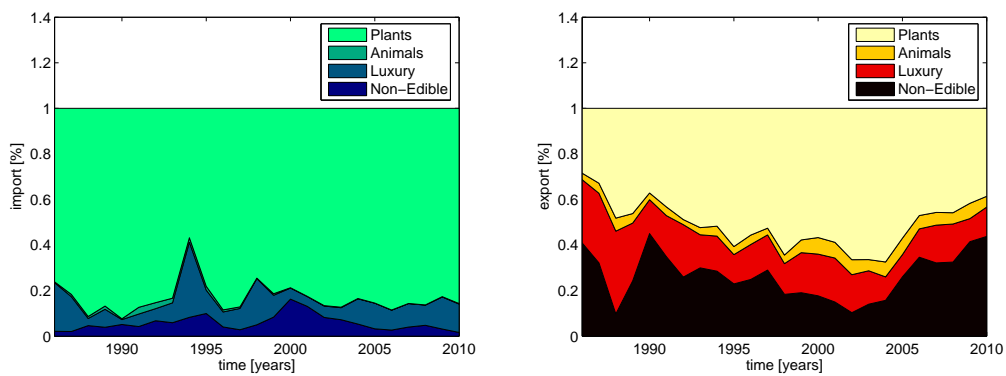

**Fig. VII.c.** Contributions of each category to the total import (left) and export (right) of the country in the period 1986-2010.

# INDONESIA

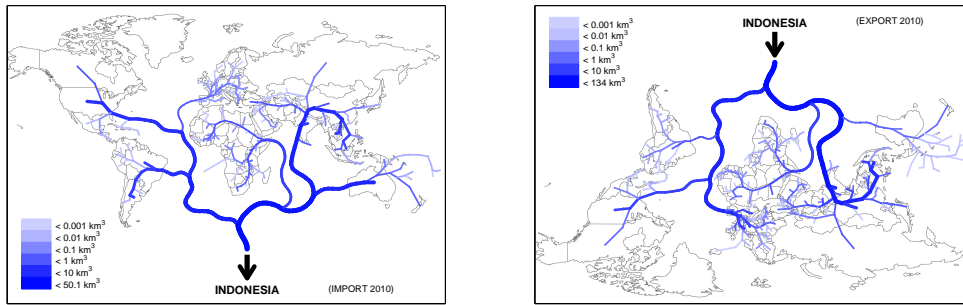

**Fig. VIII.a.** The virtual water river/delta flowing to/from the country in 2010.

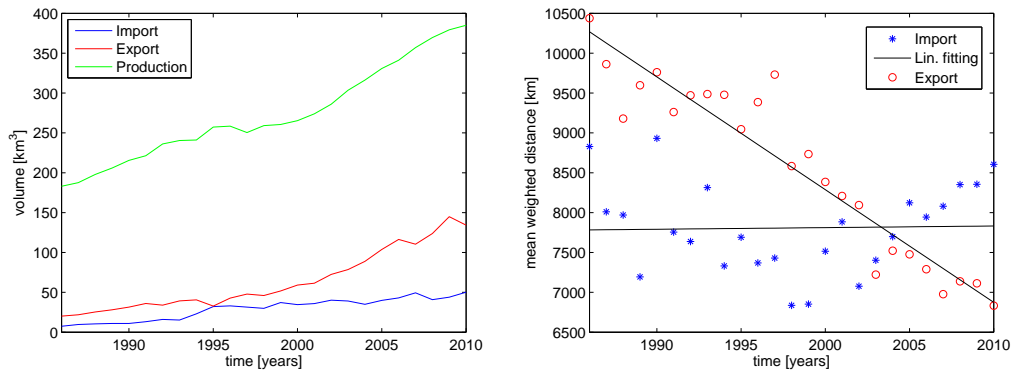

**Fig. VIII.b.** Virtual water balance of the country (left) and mean distance travelled by virtual water flowing to/from the country (right), in the period 1986-2010.

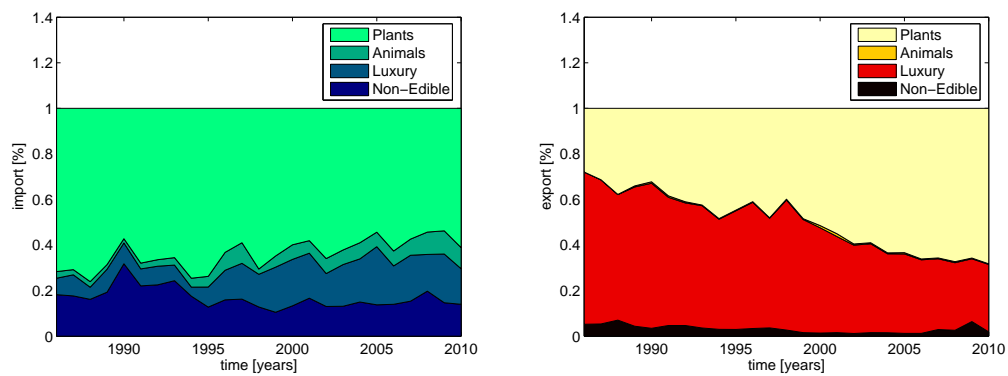

**Fig. VIII.c.** Contributions of each category to the total import (left) and export (right) of the country in the period 1986-2010.

# JAPAN

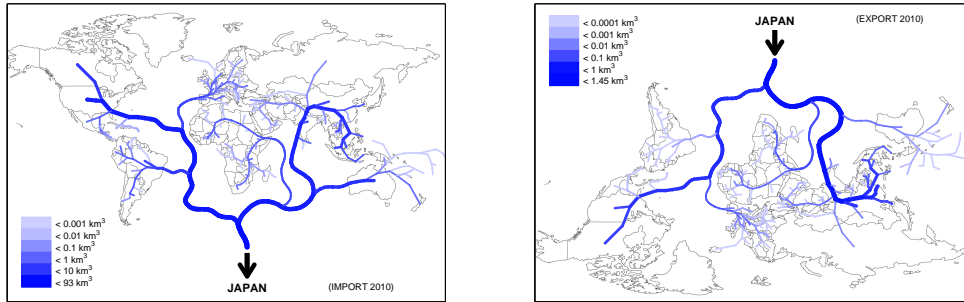

Fig. IX.a. The virtual water river/delta flowing to/from the country in 2010.

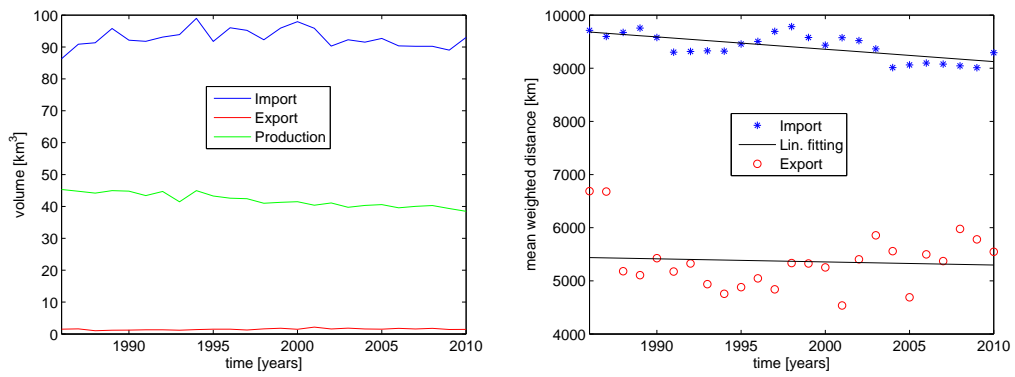

Fig. IX.b. Virtual water balance of the country (left) and mean distance travelled by virtual water flowing to/from the country (right), in the period 1986-2010.

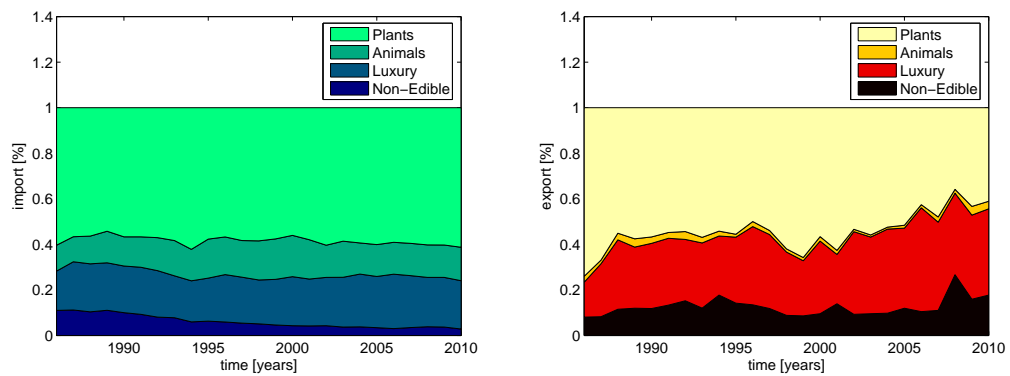

Fig. IX.c. Contributions of each category to the total import (left) and export (right) of the country in the period 1986-2010.

# UNITED STATES OF AMERICA

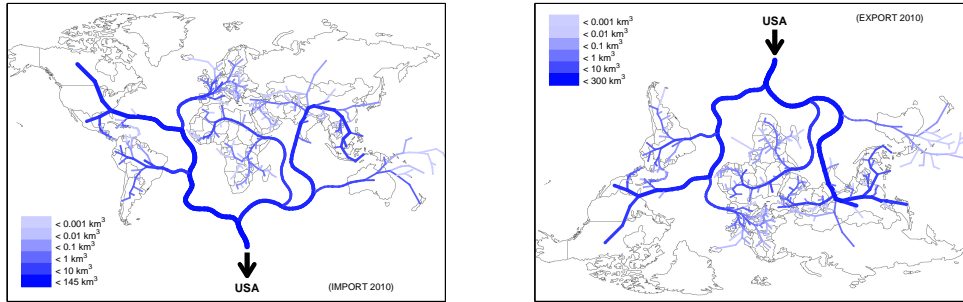

**Fig. X.a.** The virtual water river/delta flowing to/from the country in 2010.

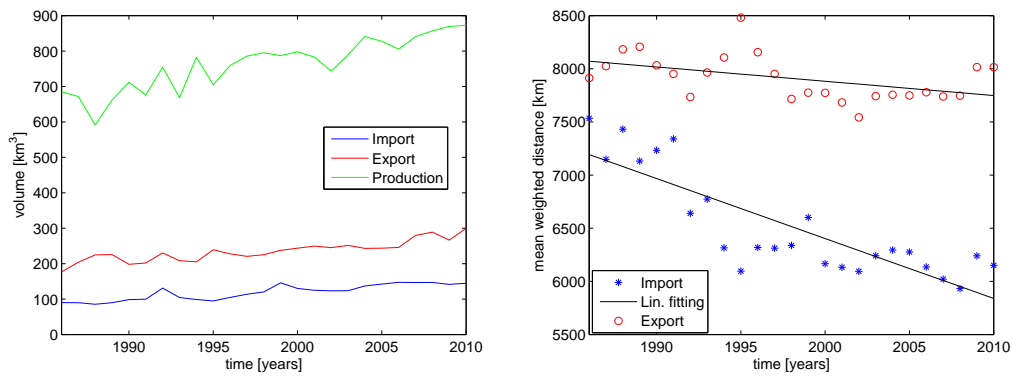

**Fig. X.b.** Virtual water balance of the country (left) and mean distance travelled by virtual water flowing to/from the country (right), in the period 1986-2010.

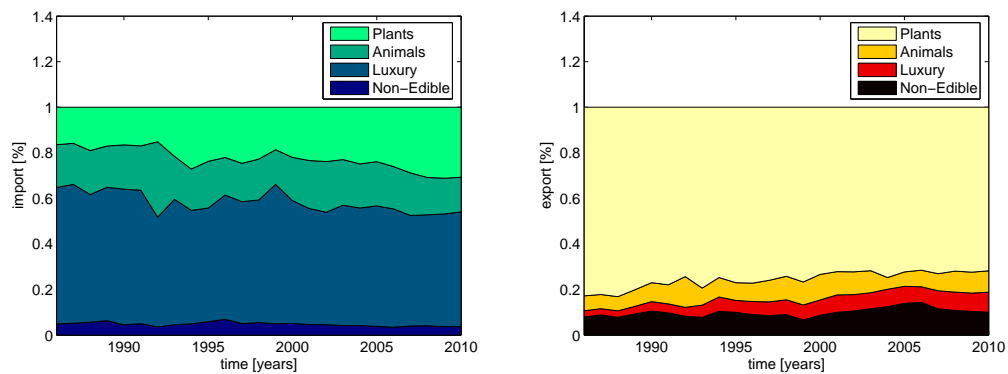

**Fig. X.c.** Contributions of each category to the total import (left) and export (right) of the country in the period 1986-2010.
